## CORRECTION

# Correction: Prevalence and associated factors of playing-related musculoskeletal disorders among music students in Europe. Baseline findings from the Risk of Music Students (RISMUS) longitudinal multicentre study

The *PLOS ONE* Staff

There is an error in affiliation 1 for authors Cinzia Cruder and Marco Barbero. The correct affiliation 1 is: Rehabilitation Research Laboratory 2rLab, Department of Business Economics, Health and Social Care, University of Applied Sciences and Arts of Southern Switzerland, Manno, Switzerland.

There is also an error in affiliation 4 for author Emiliano Soldini. The correct affiliation 4 is: Research Methodology Competence Centre, Department of Business, Health and Social Care, University of Applied Sciences and Arts of Southern Switzerland (SUPSI), Manno, Switzerland.

The publisher apologizes for the error.

## Reference

1. Cruder C, Barbero M, Koufaki P, Soldini E, Gleeson N (2020) Prevalence and associated factors of playing-related musculoskeletal disorders among music students in Europe. Baseline findings from the Risk of Music Students (RISMUS) longitudinal multicentre study. *PLoS ONE* 15(12): e0242660. <https://doi.org/10.1371/journal.pone.0242660> PMID: 33296381

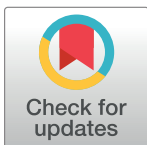

## OPEN ACCESS

**Citation:** The *PLOS ONE* Staff (2021) Correction: Prevalence and associated factors of playing-related musculoskeletal disorders among music students in Europe. Baseline findings from the Risk of Music Students (RISMUS) longitudinal multicentre study. *PLoS ONE* 16(10): e0258608. <https://doi.org/10.1371/journal.pone.0258608>

**Published:** October 11, 2021

**Copyright:** © 2021 The PLOS ONE Staff. This is an open access article distributed under the terms of the [Creative Commons Attribution License](https://creativecommons.org/licenses/by/4.0/), which permits unrestricted use, distribution, and reproduction in any medium, provided the original author and source are credited.
